# Supplementary material for: The Mitogenomic Characterization and Phylogenetic Analysis of the Plant Pathogen Phyllosticta yuccae
Source: MDPI journal article supplement (doi:10.3390/genes15010111), 2024-01-17
Supplement: s1 [file s1]

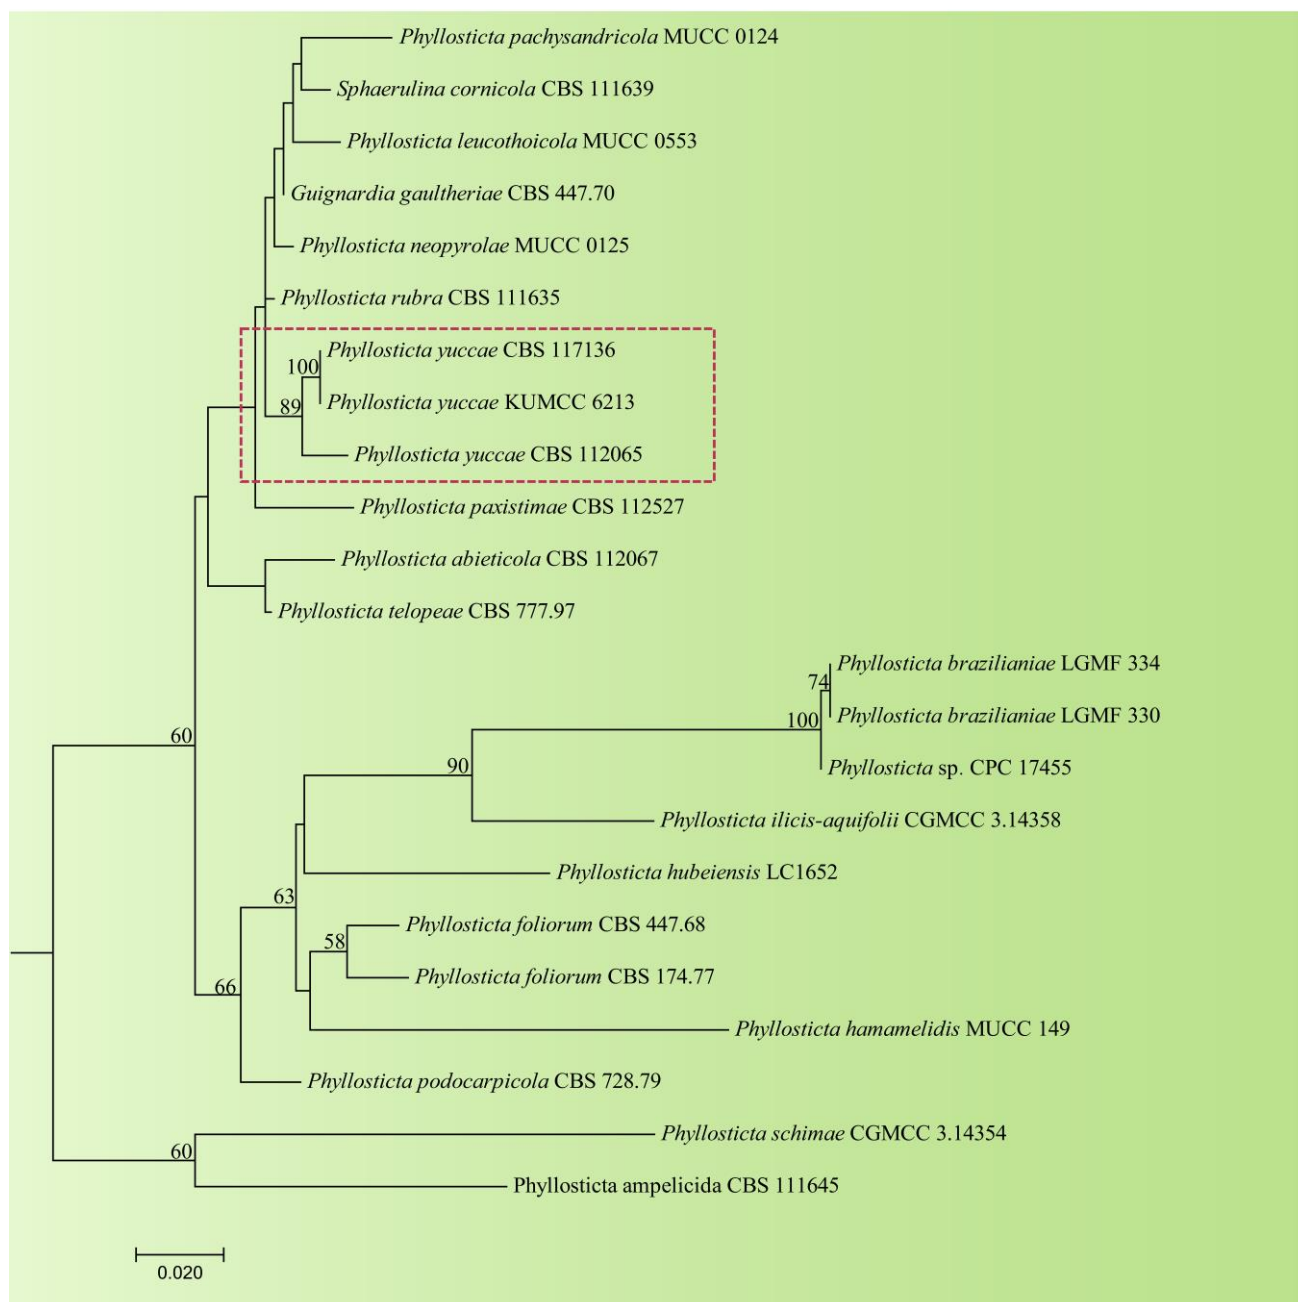

**Figure S1.** Phylogenetic tree of 23 species within *Phyllosticta* based on Maximum likelihood analysis of ITS gene.

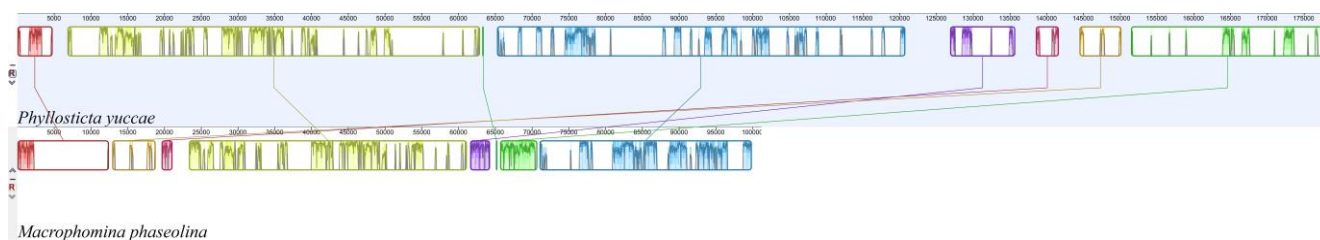

**Figure S2.** Mitogenome comparative collinearity analysis between *P. yuccae* and *M. phaseolina*.
