# Supplementary material for: The Mitogenomic Characterization and Phylogenetic Analysis of the Plant Pathogen Phyllosticta yuccae
Source: Genes (Basel). 2024 Jan 17;15(1):111. doi: 10.3390/genes15010111 (PMC10815617; doi:10.3390/genes15010111)
Supplement: Supplementary file 1 [file genes-15-00111-s001.zip]

Archive with 10 entries (10 files):
- Figure S1.jpg
- Figure S2.jpg
- genes-2785523 - Supplementary Figures.pdf
- Table S1 partition models.xlsx
- Table S2 tRNAfeature.xlsx
- Table S3 REPuter.xlsx
- Table S4 Tandem repeats.xlsx
- Table S5 condon usage.xlsx
- Table S6 Microsatellite.xlsx
- Table S7 GeneBanknumber.xlsx
