# Supplementary material for: The Mitogenomic Characterization and Phylogenetic Analysis of the Plant Pathogen Phyllosticta yuccae
Source: Genes (Basel). 2024 Jan 17;15(1):111. doi: 10.3390/genes15010111 (PMC10815617; doi:10.3390/genes15010111)
Supplement: Supplementary file 1 [file genes-15-00111-s001.zip › Table S1 partition models.xlsx]

## Sheet: Table S1
Table S1 The best-fit edge-unlinked partition model
The best-fit edge-unlinked partition model of the nucleotide sequences of 14 PCGs of 28 mitogenomes for BI
Partitions	best-fit model
atp8	GTR+F+G4
atp9	GTR+F+G4
cox1	GTR+F+G4
nad3	GTR+F+G4
nad4L	GTR+F+I+G4
nad4	GTR+F+I+G4
nad5	GTR+F+I+G4
nad6	GTR+F+I+G4
cox2	GTR+F+I+G4
cox3	GTR+F+I+G4
nad1	GTR+F+I+G4
nad2	GTR+F+I+G4
cob	GTR+F+I+G4
atp6	GTR+F+I+G4
The best-fit edge-unlinked partition model of the nucleotide sequences of 14 PCGs of 28 mitogenomes for ML
Partitions	best-fit model
atp6	GTR+F+R4
atp8	K3Pu+F+G4
atp9	GTR+F+R3
cob	TIM+F+I+I+R4
cox1	GTR+F+R3
cox2	GTR+F+I+G4
cox3	TIM+F+R3
nad1	GTR+F+I+I+R3
nad2	GTR+F+I+I+R4
nad3	GTR+F+I+G4
nad4L	GTR+F+I+I+R3
nad4	GTR+F+I+I+R3
nad5	GTR+F+R5
nad6	GTR+F+I+I+R3
