# Supplementary material for: The Mitogenomic Characterization and Phylogenetic Analysis of the Plant Pathogen Phyllosticta yuccae
Source: Genes (Basel). 2024 Jan 17;15(1):111. doi: 10.3390/genes15010111 (PMC10815617; doi:10.3390/genes15010111)
Supplement: Supplementary file 1 [file genes-15-00111-s001.zip › Table S2 tRNAfeature.xlsx]

## Sheet: Table S2
Table S2 tRNA feature and organization in the P. yuccae mitogenome
NO.	Feature	Start	End	Length	Anticodon	Strand
1	trnY-GTA	15898	15982	85	GUA	+
2	trnM-CAT	20144	20215	72	CAU	+
3	trnK-TTT	20660	20731	72	UUU	+
4	trnG-TCC	21161	21232	72	UCC	+
5	trnV-TAC	21530	21602	73	UAC	+
6	trnD-GTC	22230	22302	73	GUC	+
7	trnW-TCA	22822	22894	73	UCA	+
8	trnS-GCT	22472	22552	81	GCU	+
9	trnI-GAT	23026	23097	72	GAU	+
10	trnS-TGA	23121	23207	87	UGA	+
11	trnP-TGG	23232	23304	73	UGG	+
12	trnT-TGT	39448	39519	72	UGU	+
13	trnM-CAT	39582	39654	73	CAU	+
14	trnL-TAA	40240	40323	84	UAA	+
15	trnE-TTC	40534	40607	74	UUC	+
16	trnA-TGC	40657	40728	72	UGC	+
17	trnF-GAA	44186	44258	73	GAA	+
18	trnL-TAG	44325	44408	84	UAG	+
19	trnN-GTT	45737	45808	72	GUU	+
20	trnR-ACG	45937	46007	71	ACG	+
21	trnQ-TTG	46338	46411	74	UUG	+
22	trnF-GAA	46469	46541	73	GAA	+
23	trnH-GTG	47406	47477	72	GUG	+
24	trnM-CAT	47493	47565	73	CAU	+
25	trnC-GCA	62632	62704	73	GCA	+
26	trnR-CCT	177628	177698	71	CCU	+
