# Supplementary material for: The Mitogenomic Characterization and Phylogenetic Analysis of the Plant Pathogen Phyllosticta yuccae
Source: Genes (Basel). 2024 Jan 17;15(1):111. doi: 10.3390/genes15010111 (PMC10815617; doi:10.3390/genes15010111)
Supplement: Supplementary file 1 [file genes-15-00111-s001.zip › Table S3 REPuter.xlsx]

## Sheet: Table S3 
Table S3 Distribution of repeat loci in the mitogenome of P. yuccae and M. phaseolina as revealed by REPuter
Species	Size	Repeats 1 start	Type	Size	Repeats 2 start	E-value
Phyllosticta yuccae Bissett	214	96849	F	214	96870	1.29e-119
	193	96849	F	193	96891	5.69e-107
	172	96849	F	172	96912	2.5e-94
	151	96849	F	151	96933	1.1e-81
	130	96849	F	130	96954	4.84e-69
	129	6756	F	129	121502	1.83e-61
	109	96849	F	109	96975	2.13e-56
	114	44176	F	114	46459	1.35e-52
	107	6778	F	107	121524	1.74e-50
	101	62865	F	101	123951	6.28e-45
	89	16386	F	89	122250	2.34e-44
	88	96849	F	88	96996	9.36e-44
	81	6804	F	81	121550	3.73e-37
	77	25900	F	77	173722	3.93e-37
	84	44206	F	84	46489	7.52e-37
	72	39346	F	72	39358	4.02e-34
	82	6740	F	82	121486	9.17e-34
	82	134929	F	82	138007	9.17e-34
	67	96849	F	67	97017	4.12e-31
	74	76973	F	74	173702	4.4e-29
	62	6823	F	62	121569	4.22e-28
	60	39346	F	60	39370	6.74e-27
	65	99110	F	65	100055	1.23e-25
	67	6010	F	67	42926	5.32e-25
	63	158357	F	63	173691	1.85e-24
	66	76961	F	66	158356	2.03e-24
	55	39382	F	55	117194	6.91e-24
	65	76951	F	65	91773	7.77e-24
	65	150113	F	65	150927	7.77e-24
	63	6033	F	63	42949	1.13e-22
	63	76962	F	63	173691	1.13e-22
	62	85280	F	62	91291	4.3e-22
	55	98649	F	55	101180	1.14e-21
	61	76991	F	61	173720	1.64e-21
	59	25900	F	59	76993	2.37e-20
	59	118275	F	59	120447	2.37e-20
	49	39345	F	49	117193	2.83e-20
	52	150126	F	52	150940	6.9e-20
	58	16438	F	58	45979	8.99e-20
	55	91783	F	55	158356	9.23e-20
	48	39346	F	48	39382	1.13e-19
	48	39358	F	48	117194	1.13e-19
	48	39370	F	48	117194	1.13e-19
	48	100622	F	48	101185	1.13e-19
	54	76973	F	54	158368	3.56e-19
	54	91784	F	54	173691	3.56e-19
	47	98655	F	47	100623	4.53e-19
	46	36960	P	46	36960	1.81e-18
	46	39124	P	46	39124	1.81e-18
	46	74698	P	46	74698	1.81e-18
	46	96849	F	46	97038	1.81e-18
	54	11027	F	54	31402	1.85e-17
	54	105176	F	54	127932	1.85e-17
	47	134808	F	47	156517	6.38e-17
	53	54368	F	53	103194	6.99e-17
	50	134961	F	50	138039	7.8e-17
	46	91792	F	46	158365	2.5e-16
	46	91792	F	46	173699	2.5e-16
	46	121648	F	46	151311	2.5e-16
	46	150058	F	46	150872	2.5e-16
	49	105621	F	49	128373	2.99e-16
	42	2974	F	42	4426	4.63e-16
	45	137908	P	45	137908	9.78e-16
	48	25911	F	48	77004	1.15e-15
	48	77004	F	48	173733	1.15e-15
	41	4116	F	41	4127	1.85e-15
	44	76983	F	44	158378	3.82e-15
	40	103486	P	40	103486	7.42e-15
	40	132238	F	40	156518	7.42e-15
	43	76973	F	43	91795	1.49e-14
	43	158411	P	43	158411	1.49e-14
	43	164886	P	43	164886	1.49e-14
	46	55203	F	46	104182	1.69e-14
	42	158378	F	42	173712	5.84e-14
	45	126898	F	45	154097	6.45e-14
	38	25924	F	38	158413	1.19e-13
	38	158413	F	38	173746	1.19e-13
	44	6052	F	44	42968	2.47e-13
	37	150141	F	37	150955	4.75e-13
	40	132238	F	40	134809	8.9e-13
	36	36209	P	36	36209	1.9e-12
	36	39346	F	36	39394	1.9e-12
	36	39346	F	36	117206	1.9e-12
	36	39394	F	36	117194	1.9e-12
	36	103202	F	36	121225	1.9e-12
	36	117194	F	36	117206	1.9e-12
	36	120663	F	36	123787	1.9e-12
	45	51598	P	45	51598	2.77e-12
	45	148338	F	45	149259	2.77e-12
	39	137673	P	39	137673	3.47e-12
	42	77047	F	42	158448	3.59e-12
	35	28126	F	35	128486	7.59e-12
	44	72761	F	44	173238	1.04e-11
	38	25924	P	38	158414	1.35e-11
	38	158414	P	38	173746	1.35e-11
	34	54378	F	34	121227	3.04e-11
	34	78505	F	34	111965	3.04e-11
	34	126900	F	34	132241	3.04e-11
	34	126900	F	34	156521	3.04e-11
	34	158386	F	34	173720	3.04e-11
	43	54604	F	43	103419	3.86e-11
	40	33412	F	40	139184	5.21e-11
	40	62926	F	40	124012	5.21e-11
	40	123867	P	40	123867	5.21e-11
	40	163735	F	40	167367	5.21e-11
	37	22697	P	37	22697	5.27e-11
	37	25925	P	37	25925	5.27e-11
	37	25925	P	37	173747	5.27e-11
	37	173747	P	37	173747	5.27e-11
	33	91805	F	33	158378	1.22e-10
	39	1192	F	39	2331	1.98e-10
	36	105634	F	36	128386	2.05e-10
	32	25900	F	32	158388	4.86e-10
	32	102983	P	32	102983	4.86e-10
	41	53173	P	41	53173	5.34e-10
	41	69873	F	41	70779	5.34e-10
	41	87890	F	41	89097	5.34e-10
	38	103084	P	38	103084	7.51e-10
	38	126896	F	38	134808	7.51e-10
	35	22699	P	35	99460	7.97e-10
	35	46114	F	35	137244	7.97e-10
	31	99144	F	31	100089	1.94e-09
	40	77063	F	40	91850	1.98e-09
	40	148352	F	40	149273	1.98e-09
	40	148801	F	40	149642	1.98e-09
	34	91938	F	34	158513	3.1e-09
	34	134977	F	34	138055	3.1e-09
	39	47927	P	39	47927	7.32e-09
	39	53715	P	39	53715	7.32e-09
	39	76951	F	39	173680	7.32e-09
	39	77055	F	39	91842	7.32e-09
	39	82443	F	39	117093	7.32e-09
	39	87900	F	39	89107	7.32e-09
	39	91773	F	39	173680	7.32e-09
	39	118314	F	39	120486	7.32e-09
	30	4116	F	30	4138	7.78e-09
	30	16466	F	30	46007	7.78e-09
	36	16173	F	36	45774	1.08e-08
	36	16498	F	36	122362	1.08e-08
	36	28037	F	36	109054	1.08e-08
	36	28176	F	36	128529	1.08e-08
	36	78502	F	36	167371	1.08e-08
	33	3456	F	33	137914	1.2e-08
	38	78481	F	38	163718	2.7e-08
	38	118377	F	38	120549	2.7e-08
	35	22697	F	35	99460	4.07e-08
	35	25844	F	35	158332	4.07e-08
	35	77017	F	35	158413	4.07e-08
	35	109285	F	35	139313	4.07e-08
	37	3454	P	37	3454	9.96e-08
	37	26143	F	37	173902	9.96e-08
	37	28760	P	37	28760	9.96e-08
	37	45979	F	37	122302	9.96e-08
	37	78483	F	37	165278	9.96e-08
	37	91727	F	37	158301	9.96e-08
	37	99201	F	37	100145	9.96e-08
	37	123051	F	37	123141	9.96e-08
	34	26053	F	34	158514	1.53e-07
	34	26095	P	34	26095	1.53e-07
	34	82314	P	34	82314	1.53e-07
	34	132241	F	34	154099	1.53e-07
	34	154099	F	34	156521	1.53e-07
	31	1200	F	31	2339	1.81e-07
	31	77021	P	31	77021	1.81e-07
	31	126912	F	31	154111	1.81e-07
	36	11049	F	36	31424	3.66e-07
	36	52054	F	36	68805	3.66e-07
	36	114398	F	36	116070	3.66e-07
	36	148224	F	36	149142	3.66e-07
	36	163720	F	36	165278	3.66e-07
	33	3456	P	33	137914	5.77e-07
	33	19308	F	33	31409	5.77e-07
	33	70778	F	33	172704	5.77e-07
	33	82876	F	33	116512	5.77e-07
	33	103095	P	33	164882	5.77e-07
	33	111965	F	33	167374	5.77e-07
	30	36274	F	30	178490	7e-07
	30	55219	F	30	104198	7e-07
	30	62936	F	30	124022	7e-07
	30	75225	P	30	86968	7e-07
	35	77017	P	35	158417	1.34e-06
	35	118389	F	35	120561	1.34e-06
	35	138135	P	35	138135	1.34e-06
	32	29614	P	32	29614	2.17e-06
	32	54594	F	32	103409	2.17e-06
	32	77020	P	32	137915	2.17e-06
	32	78502	F	32	165297	2.17e-06
	32	96849	F	32	97059	2.17e-06
	32	105675	F	32	128427	2.17e-06
	34	25928	P	34	77018	4.91e-06
	34	26039	F	34	158500	4.91e-06
	34	28391	F	34	85777	4.91e-06
	34	28897	F	34	94993	4.91e-06
	34	33624	F	34	139316	4.91e-06
	34	48398	F	34	48838	4.91e-06
	34	77018	P	34	173750	4.91e-06
	34	77137	F	34	158513	4.91e-06
	34	134812	F	34	154099	4.91e-06
	34	158572	F	34	173902	4.91e-06
	31	28127	F	31	105736	8.14e-06
	31	40957	F	31	121806	8.14e-06
	31	49333	F	31	58367	8.14e-06
	31	85213	F	31	91222	8.14e-06
	31	86211	F	31	105297	8.14e-06
	31	105736	F	31	128487	8.14e-06
	31	123128	F	31	123227	8.14e-06
	31	138287	F	31	138359	8.14e-06
	31	148214	F	31	149132	8.14e-06
	33	3457	P	33	77019	1.79e-05
	33	7438	F	33	30678	1.79e-05
	33	11034	F	33	19308	1.79e-05
	33	26053	F	33	91939	1.79e-05
	33	27966	F	33	104723	1.79e-05
	33	55229	F	33	104208	1.79e-05
	33	69068	F	33	115140	1.79e-05
	33	82455	F	33	117105	1.79e-05
	33	99334	P	33	99334	1.79e-05
	33	99334	F	33	137914	1.79e-05
	33	99462	P	33	99462	1.79e-05
	33	103103	F	33	164908	1.79e-05
	33	128131	F	33	169687	1.79e-05
	30	16567	F	30	122437	3.04e-05
	30	19311	F	30	51669	3.04e-05
	30	26056	F	30	77141	3.04e-05
	30	31425	F	30	51682	3.04e-05
	30	109331	F	30	164899	3.04e-05
	30	122935	P	30	122935	3.04e-05
	30	148468	F	30	149389	3.04e-05
	30	161321	R	30	161321	3.04e-05
	30	172130	P	30	172130	3.04e-05
	30	172134	P	30	172134	3.04e-05
	32	1641	F	32	90737	6.51e-05
	32	3766	F	32	169701	6.51e-05
	32	6688	F	32	46205	6.51e-05
	32	6843	F	32	151241	6.51e-05
	32	25901	F	32	101636	6.51e-05
	32	26018	F	32	91865	6.51e-05
	32	58695	F	32	64628	6.51e-05
	32	67998	F	32	126901	6.51e-05
	32	67998	F	32	132242	6.51e-05
	32	67998	F	32	154100	6.51e-05
	32	67998	F	32	156522	6.51e-05
	32	77020	F	32	137914	6.51e-05
	32	77141	F	32	91942	6.51e-05
	32	77174	F	32	173901	6.51e-05
	32	81352	F	32	100793	6.51e-05
	32	82138	F	32	116788	6.51e-05
	32	101636	F	32	173723	6.51e-05
	32	105504	F	32	128256	6.51e-05
	32	111965	F	32	165300	6.51e-05
	32	114406	F	32	116078	6.51e-05
	32	121589	F	32	151241	6.51e-05
	32	125192	F	32	152381	6.51e-05
	32	128142	F	32	162831	6.51e-05
	32	167600	F	32	175554	6.51e-05
	31	25835	F	31	173657	0.000236
	31	25955	F	31	158446	0.000236
	31	26143	F	31	77175	0.000236
	31	40002	P	31	138135	0.000236
	31	45232	F	31	99470	0.000236
	31	48386	P	31	48843	0.000236
	31	59626	F	31	112228	0.000236
	31	60463	F	31	62146	0.000236
	31	76951	F	31	158346	0.000236
	31	77074	F	31	91861	0.000236
	31	85779	F	31	139490	0.000236
	31	85782	F	31	156964	0.000236
	31	91773	F	31	158346	0.000236
	31	101636	F	31	158389	0.000236
	31	109331	P	31	164885	0.000236
	31	158346	F	31	173680	0.000236
	30	827	F	30	1991	0.000852
	30	1636	F	30	159313	0.000852
	30	2691	F	30	175656	0.000852
	30	3460	F	30	99338	0.000852
	30	6128	F	30	135772	0.000852
	30	6702	F	30	46219	0.000852
	30	6722	F	30	46239	0.000852
	30	7376	F	30	30616	0.000852
	30	9165	F	30	17745	0.000852
	30	12549	F	30	178493	0.000852
	30	13727	F	30	19311	0.000852
	30	16054	F	30	20164	0.000852
	30	25933	F	30	77026	0.000852
	30	27693	F	30	77264	0.000852
	30	28045	F	30	109062	0.000852
	30	28078	F	30	104830	0.000852
	30	28126	F	30	139272	0.000852
	30	32299	F	30	73477	0.000852
	30	33566	F	30	139272	0.000852
	30	46143	F	30	137276	0.000852
	30	58941	F	30	59103	0.000852
	30	59622	F	30	156958	0.000852
	30	76895	F	30	91717	0.000852
	30	77018	F	30	140614	0.000852
	30	77026	F	30	173755	0.000852
	30	87991	F	30	89198	0.000852
	30	88408	F	30	128049	0.000852
	30	90727	F	30	139494	0.000852
	30	93706	F	30	94497	0.000852
	30	105381	F	30	169689	0.000852
	30	105582	F	30	128334	0.000852
	30	111331	F	30	139133	0.000852
	30	111971	F	30	163748	0.000852
	30	117942	F	30	120122	0.000852
	30	128486	F	30	139272	0.000852
	30	139491	F	30	156962	0.000852
	30	148285	F	30	149203	0.000852
	30	148769	F	30	149610	0.000852
	30	158483	F	30	173820	0.000852
Macrophomina phaseolina	83	45854	F	83	57013	9.43e-37
	80	57051	F	80	78343	4.37e-33
	76	61084	F	76	70695	9.58e-31
	61	72512	F	61	73547	5.42e-28
	64	61096	F	64	70707	1.54e-25
	62	50455	F	62	53081	2.3e-24
	65	62791	F	65	66884	2.5e-24
	54	42042	F	54	44908	8.88e-24
	52	54089	F	52	82545	1.42e-22
	54	57077	F	54	78369	1.14e-19
	50	19557	F	50	33851	3.41e-19
	46	50471	F	46	53097	5.82e-19
	45	36232	P	45	41980	2.33e-18
	42	25104	P	42	71085	1.49e-16
	45	45892	F	45	78343	3.14e-16
	51	67334	F	51	85193	3.19e-16
	50	26325	F	50	39885	1.2e-15
	47	62809	F	47	66902	1.41e-15
	48	57001	F	48	78293	1.7e-14
	42	41944	F	42	67603	1.88e-14
	42	61118	F	42	70729	1.88e-14
	38	4924	F	38	70864	3.81e-14
	36	36241	P	36	41944	6.1e-13
	36	41944	F	36	41980	6.1e-13
	38	72579	F	38	73614	4.35e-12
	34	67351	F	34	85210	9.76e-12
	37	41979	F	37	67602	1.69e-11
	37	62819	F	37	66912	1.69e-11
	33	6604	F	33	6634	3.9e-11
	33	11934	R	33	11934	3.9e-11
	42	4064	P	42	5686	4.62e-11
	36	36241	P	36	67603	6.59e-11
	41	57104	F	41	78396	1.71e-10
	41	75678	F	41	75682	1.71e-10
	38	72621	F	38	73657	2.41e-10
	38	91149	F	38	92220	2.41e-10
	35	46538	P	35	46538	2.56e-10
	35	54731	P	35	54731	2.56e-10
	40	19969	F	40	33986	6.36e-10
	39	40542	F	39	94550	2.35e-09
	39	53565	P	39	60643	2.35e-09
	36	67351	F	36	68420	3.46e-09
	36	68418	F	36	85208	3.46e-09
	38	46009	F	38	78444	8.68e-09
	38	68397	F	38	85187	8.68e-09
	35	2180	F	35	8635	1.31e-08
	35	3494	F	35	64877	1.31e-08
	35	11934	R	35	11934	1.31e-08
	35	26340	F	35	39900	1.31e-08
	32	19203	F	32	33375	1.5e-08
	37	72631	F	37	73667	3.2e-08
	34	11934	P	34	11934	4.93e-08
	34	11934	C	34	11935	4.93e-08
	34	11935	P	34	11935	4.93e-08
	34	28633	F	34	80179	4.93e-08
	34	40600	F	34	94608	4.93e-08
	34	45856	F	34	78307	4.93e-08
	34	45950	F	34	78400	4.93e-08
	34	56948	F	34	78240	4.93e-08
	34	57015	F	34	78307	4.93e-08
	31	740	F	31	41294	5.81e-08
	31	99859	F	31	100925	5.81e-08
	36	69669	F	36	77970	1.18e-07
	33	11934	F	33	11936	1.85e-07
	33	11936	R	33	11936	1.85e-07
	33	40610	F	33	94618	1.85e-07
	30	26365	F	30	27535	2.25e-07
	30	30224	F	30	31086	2.25e-07
	35	11932	R	35	75690	4.31e-07
	35	31691	F	35	34513	4.31e-07
	35	40720	F	35	62167	4.31e-07
	32	11934	P	32	11934	6.97e-07
	32	11934	C	32	11937	6.97e-07
	32	11937	P	32	11937	6.97e-07
	32	11937	C	32	75684	6.97e-07
	32	28039	F	32	101161	6.97e-07
	32	84937	P	32	84940	6.97e-07
	34	737	F	34	92972	1.58e-06
	34	11934	P	34	75680	1.58e-06
	34	11936	R	34	75689	1.58e-06
	34	69680	F	34	77981	1.58e-06
	31	11934	R	31	11934	2.61e-06
	31	11934	F	31	11938	2.61e-06
	31	11938	R	31	11938	2.61e-06
	31	18479	F	31	78397	2.61e-06
	31	19583	F	31	33877	2.61e-06
	33	741	F	33	62601	5.75e-06
	33	1197	F	33	79648	5.75e-06
	33	11934	F	33	75690	5.75e-06
	33	11935	C	33	75690	5.75e-06
	33	11935	P	33	75690	5.75e-06
	33	11935	F	33	76393	5.75e-06
	33	11936	F	33	75690	5.75e-06
	33	68427	F	33	85217	5.75e-06
	30	3772	P	30	3772	9.78e-06
	30	11934	P	30	11934	9.78e-06
	30	11934	C	30	11939	9.78e-06
	30	11938	R	30	76391	9.78e-06
	30	11939	P	30	11939	9.78e-06
	30	11940	R	30	75693	9.78e-06
	30	19566	F	30	36247	9.78e-06
	30	19566	P	30	41944	9.78e-06
	30	19566	P	30	41980	9.78e-06
	30	19569	P	30	67600	9.78e-06
	30	44569	F	30	62827	9.78e-06
	32	11934	P	32	75690	2.09e-05
	32	11934	C	32	75691	2.09e-05
	32	11937	C	32	75680	2.09e-05
	32	11937	C	32	75690	2.09e-05
	32	11937	P	32	75691	2.09e-05
	32	40718	F	32	57107	2.09e-05
	32	40718	F	32	78399	2.09e-05
	32	48128	R	32	48142	2.09e-05
	32	67311	F	32	85170	2.09e-05
	32	75690	R	32	76393	2.09e-05
	32	80076	F	32	95157	2.09e-05
	31	11934	R	31	75690	7.58e-05
	31	11934	F	31	75692	7.58e-05
	31	11938	F	31	75690	7.58e-05
	31	11938	R	31	75692	7.58e-05
	31	16529	P	31	16529	7.58e-05
	31	20031	F	31	34051	7.58e-05
	31	27535	F	31	39925	7.58e-05
	31	32005	P	31	32005	7.58e-05
	31	44773	P	31	44773	7.58e-05
	31	49257	P	31	60105	7.58e-05
	31	62794	P	31	66885	7.58e-05
	31	75678	F	31	75692	7.58e-05
	31	75684	F	31	75692	7.58e-05
	31	81632	F	31	82778	7.58e-05
	31	92162	P	31	92162	7.58e-05
	31	99836	F	31	100900	7.58e-05
	30	11934	F	30	11940	0.000274
	30	11934	P	30	75680	0.000274
	30	11934	P	30	75690	0.000274
	30	11934	F	30	75694	0.000274
	30	11935	C	30	75694	0.000274
	30	11939	C	30	75690	0.000274
	30	11939	P	30	75693	0.000274
	30	11941	C	30	32810	0.000274
	30	13816	F	30	49096	0.000274
	30	13835	F	30	49117	0.000274
	30	14967	P	30	70433	0.000274
	30	15564	F	30	21364	0.000274
	30	18480	F	30	40717	0.000274
	30	33860	F	30	36247	0.000274
	30	33860	P	30	41944	0.000274
	30	33860	P	30	41980	0.000274
	30	33863	P	30	67600	0.000274
	30	44569	F	30	66920	0.000274
	30	52596	R	30	52611	0.000274
	30	54504	F	30	82773	0.000274
	30	57109	F	30	62167	0.000274
	30	75690	R	30	76391	0.000274
	30	83440	F	30	93789	0.000274
	30	86172	F	30	98215	0.000274
	30	92039	F	30	92060	0.000274
