# Supplementary material for: The Mitogenomic Characterization and Phylogenetic Analysis of the Plant Pathogen Phyllosticta yuccae
Source: Genes (Basel). 2024 Jan 17;15(1):111. doi: 10.3390/genes15010111 (PMC10815617; doi:10.3390/genes15010111)
Supplement: Supplementary file 1 [file genes-15-00111-s001.zip › Table S4 Tandem repeats.xlsx]

## Sheet: Table S4
Table S4 Tandem repeats detected in the mitogenomes of P. yuccae and M. phaseolina
Species	NO.	Indices	Period Size	Copy Number	Consensus Size	Percent Matches	Percent Indels	Score	Entropy (0-2)
P. yuccae	1	4117--4168	11	4.7	11	100	0	104	1.77
	2	29543--29588	23	2	23	83	8	58	1.66
	3	39347--39430	12	7	12	100	0	168	1.96
	4	48303--48360	27	2.1	27	83	0	71	1.7
	5	62368--62435	19	3.5	20	78	8	68	1.35
	6	62395--62425	15	2.1	15	93	0	53	1.19
	7	96850--97084	21	11.2	21	100	0	470	1.95
	8	109173--109202	10	3	10	100	0	60	1.57
	9	117195--117242	12	4	12	100	0	96	1.96
	10	121973--122006	14	2.4	14	90	5	50	0.91
	11	123019--123096	33	2.4	33	82	0	84	1.96
	12	151120--151149	6	5.2	6	92	8	53	1.92
	13	161346--161375	15	2	15	93	0	51	1.64
	14	166523--166560	15	2.5	15	100	0	76	1.16
M. phaseolina	1	6605--6667	30	2.1	30	100	0	126	1.92
	2	6977--7016	21	1.9	21	94	0	71	1.67
	3	8685--8741	17	3.6	16	80	20	75	0.95
	4	8687--8740	13	3.8	13	75	17	54	0.92
	5	11935--11969	2	17.5	2	93	0	61	1.16
	6	41952--42012	18	3.4	18	68	8	61	1.81
	7	41945--42023	36	2.2	37	97	2	151	1.88
	8	48129--48180	22	2.4	21	87	3	68	0.91
	9	54919--54961	11	3.7	11	82	11	59	1.1
	10	54913--54949	13	3	13	80	15	51	1.15
	11	54919--54967	11	4.1	12	82	15	57	1.1
	12	54913--54960	24	2	24	91	0	78	1.14
	13	61823--61865	20	2	20	86	8	59	1.57
	14	75679--75721	14	3.1	14	89	0	59	1.39
	15	75685--75723	2	19.5	2	83	0	51	1.31
	16	92040--92090	21	2.4	21	90	0	75	1.93
