# Supplementary material for: The Mitogenomic Characterization and Phylogenetic Analysis of the Plant Pathogen Phyllosticta yuccae
Source: Genes (Basel). 2024 Jan 17;15(1):111. doi: 10.3390/genes15010111 (PMC10815617; doi:10.3390/genes15010111)
Supplement: Supplementary file 1 [file genes-15-00111-s001.zip › Table S5 condon usage.xlsx]

## Sheet: Table S5
Table S5 Codon usage analysis between P. yuccae and M. phaseolina
AmAcid	Codon	Phyllosticta yuccae Bissett		Macrophomina phaseolina
		Count	RSCU	Count	RSCU
Phe	UUU(F)	268	1.31	225	1.2
	UUC(F)	140	0.69	151	0.8
Leu	UUA(L)	467	3.66	512	4.29
	UUG(L)	63	0.49	27	0.23
	CUU(L)	94	0.74	100	0.84
	CUC(L)	7	0.05	2	0.02
	CUA(L)	114	0.89	54	0.45
	CUG(L)	21	0.16	21	0.18
Ile	AUU(I)	184	0.96	205	1.13
	AUC(I)	60	0.31	44	0.24
	AUA(I)	332	1.73	293	1.62
Met	AUG(M)	109	1	121	1
Val	GUU(V)	117	1.49	146	1.58
	GUC(V)	21	0.27	11	0.12
	GUA(V)	141	1.79	175	1.89
	GUG(V)	36	0.46	38	0.41
Ser	UCU(S)	164	1.79	166	2.09
	UCC(S)	30	0.33	11	0.14
	UCA(S)	145	1.58	124	1.56
	UCG(S)	15	0.16	5	0.06
	AGU(S)	170	1.85	145	1.83
	AGC(S)	26	0.28	25	0.32
Pro	CCU(P)	101	2.28	100	2.52
	CCC(P)	13	0.29	9	0.23
	CCA(P)	49	1.11	40	1.01
	CCG(P)	14	0.32	10	0.25
Thr	ACU(T)	124	1.73	141	2.1
	ACC(T)	22	0.31	11	0.16
	ACA(T)	127	1.77	107	1.6
	ACG(T)	14	0.2	9	0.13
Ala	GCU(A)	129	1.67	153	2.06
	GCC(A)	30	0.39	33	0.44
	GCA(A)	121	1.57	93	1.25
	GCG(A)	29	0.38	18	0.24
Tyr	UAU(Y)	209	1.44	194	1.5
	UAC(Y)	82	0.56	65	0.5
His	CAU(H)	55	1.25	81	1.54
	CAC(H)	33	0.75	24	0.46
Gln	CAA(Q)	105	1.74	92	1.67
	CAG(Q)	16	0.26	18	0.33
Asn	AAU(N)	249	1.6	229	1.58
	AAC(N)	63	0.4	60	0.42
Lys	AAA(K)	202	1.65	222	1.69
	AAG(K)	43	0.35	41	0.31
Asp	GAU(D)	115	1.72	125	1.75
	GAC(D)	19	0.28	18	0.25
Glu	GAA(E)	140	1.57	144	1.64
	GAG(E)	38	0.43	32	0.36
Cys	UGU(C)	41	1.71	34	1.79
	UGC(C)	7	0.29	4	0.21
Trp	UGA(W)	47	1.52	55	1.8
	UGG(W)	15	0.48	6	0.2
Arg	CGU(R)	24	0.91	21	0.84
	CGC(R)	2	0.08	2	0.08
	CGA(R)	13	0.49	7	0.28
	CGG(R)	5	0.19	3	0.12
	AGA(R)	91	3.43	112	4.48
	AGG(R)	24	0.91	5	0.2
Gly	GGU(G)	177	2.06	175	2.23
	GGC(G)	6	0.07	9	0.11
	GGA(G)	124	1.45	102	1.3
	GGG(G)	36	0.42	28	0.36
	UAA(*)	8	1.14	13	1.86
	UAG(*)	6	0.86	1	0.14
