# Supplementary material for: The Mitogenomic Characterization and Phylogenetic Analysis of the Plant Pathogen Phyllosticta yuccae
Source: Genes (Basel). 2024 Jan 17;15(1):111. doi: 10.3390/genes15010111 (PMC10815617; doi:10.3390/genes15010111)
Supplement: Supplementary file 1 [file genes-15-00111-s001.zip › Table S6 Microsatellite.xlsx]

## Sheet: Table S6
Table S6 Microsatellite DNA in P. yuccae and M. phaseolina
Species	SSR nr.	size	start	end	SSR	SSR type
Phyllosticta yuccae Bissett	1	10	5062	5071	(T)10	p1
	2	10	5091	5100	(A)10	p1
	3	10	6303	6312	(A)10	p1
	4	10	6823	6832	(A)10	p1
	5	10	6854	6863	(A)10	p1
	6	12	11188	11199	(TA)6	p2
	7	10	12396	12405	(T)10	p1
	8	10	12441	12450	(T)10	p1
	9	10	14623	14632	(T)10	p1
	10	10	20000	20009	(T)10	p1
	11	10	20648	20657	(A)10	p1
	12	10	21969	21978	(C)10	p1
	13	12	22021	22032	(C)12	p1
	14	10	22443	22452	(A)10	p1
	15	11	24375	24385	(T)11	p1
	16	10	34189	34198	(T)10	p1
	17	12	34205	34216	(TA)6	p2
	18	10	36963	36972	(T)10	p1
	19	10	36995	37004	(A)10	p1
	20	10	37022	37031	(A)10	p1
	21	10	39211	39220	(A)10	p1
	22	10	39431	39440	(A)10	p1
	23	10	39554	39563	(G)10	p1
	24	10	40096	40105	(T)10	p1
	25	10	40420	40429	(T)10	p1
	26	10	42807	42816	(A)10	p1
	27	11	43708	43718	(C)11	p1
	28	11	44162	44172	(A)11	p1
	29	10	44283	44292	(G)10	p1
	30	11	44835	44845	(C)11	p1
	31	10	46328	46337	(A)10	p1
	32	10	46967	46976	(G)10	p1
	33	11	47330	47340	(T)11	p1
	34	10	47687	47696	(A)10	p1
	35	10	51551	51560	(A)10	p1
	36	10	61141	61150	(A)10	p1
	37	12	61914	61925	(AT)6	p2
	38	12	71637	71648	(TA)6	p2
	39	14	78644	78657	(AT)7	p2
	40	10	79752	79761	(C)10	p1
	41	10	80436	80445	(C)10	p1
	42	10	80453	80462	(T)10	p1
	43	16	95810	95825	(C)16	p1
	44	11	98174	98184	(C)11	p1
	45	10	98687	98696	(A)10	p1
	46	10	100655	100664	(A)10	p1
	47	10	101218	101227	(A)10	p1
	48	10	103085	103094	(T)10	p1
	49	11	103993	104003	(A)11	p1
	50	11	104341	104351	(T)11	p1
	51	10	108825	108834	(C)10	p1
	52	11	109164	109174	(C)11	p1
	53	10	109207	109216	(G)10	p1
	54	11	109353	109363	(A)11	p1
	55	10	109831	109840	(A)10	p1
	56	10	121454	121463	(A)10	p1
	57	10	121600	121609	(A)10	p1
	58	10	121771	121780	(A)10	p1
	59	10	123931	123940	(A)10	p1
	60	10	127401	127410	(T)10	p1
	61	10	127438	127447	(A)10	p1
	62	10	128926	128935	(C)10	p1
	63	10	136303	136312	(A)10	p1
	64	11	137135	137145	(A)11	p1
	65	11	138284	138294	(A)11	p1
	66	11	143466	143476	(A)11	p1
	67	10	147403	147412	(T)10	p1
	68	12	151252	151263	(A)12	p1
	69	10	159619	159628	(A)10	p1
	70	12	161322	161333	(AT)6	p2
	71	10	166639	166648	(A)10	p1
	72	12	168182	168193	(CT)6	p2
	73	18	172137	172154	(TA)9	p2
	74	12	178296	178307	(C)12	p1
Macrophomina phaseolina	1	12	3234	3245	(G)12	p1
	2	10	8517	8526	(T)10	p1
	3	10	8550	8559	(T)10	p1
	4	16	11935	11950	(TA)8	p2
	5	18	11952	11969	(AT)9	p2
	6	12	12114	12125	(AT)6	p2
	7	10	12183	12192	(T)10	p1
	8	10	16496	16505	(T)10	p1
	9	10	22211	22220	(A)10	p1
	10	10	29424	29433	(A)10	p1
	11	16	32822	32837	(AT)8	p2
	12	10	44206	44215	(T)10	p1
	13	10	44218	44227	(A)10	p1
	14	12	48643	48654	(TA)6	p2
	15	14	49091	49104	(G)14	p1
	16	10	49431	49440	(T)10	p1
	17	10	49587	49596	(T)10	p1
	18	11	51524	51534	(T)11	p1
	19	21	51858	51878	(AGG)7	p3
	20	16	52124	52139	(AT)8	p2
	21	16	52612	52627	(AT)8	p2
	22	10	52669	52678	(T)10	p1
	23	14	59402	59415	(C)14	p1
	24	10	59714	59723	(G)10	p1
	25	12	63335	63346	(TA)6	p2
	26	16	65363	65378	(AT)8	p2
	27	12	65584	65595	(AT)6	p2
	28	10	70440	70449	(T)10	p1
	29	10	70950	70959	(A)10	p1
	30	24	75699	75722	(TA)12	p2
	31	14	76394	76407	(AT)7	p2
	32	11	91013	91023	(A)11	p1
	33	10	96246	96255	(A)10	p1
	34	10	101185	101194	(T)10	p1
