# Supplementary material for: The Mitogenomic Characterization and Phylogenetic Analysis of the Plant Pathogen Phyllosticta yuccae
Source: Genes (Basel). 2024 Jan 17;15(1):111. doi: 10.3390/genes15010111 (PMC10815617; doi:10.3390/genes15010111)
Supplement: Supplementary file 1 [file genes-15-00111-s001.zip › Table S7 GeneBanknumber.xlsx]

## Sheet: Table S7
Table S7 Mitogenome information used for phylogenetic analyses in this study
Species	GenBank accession number	Phylum (order : family)
Pseudocercospora fijiensis	NC_044132	Dothideomycetes
Pseudocercospora mori	NC_037198	Dothideomycetes
Zymoseptoria tritici	NC_010222	Dothideomycetes
Zasmidium cellare	NC_030334	Dothideomycetes
Cladosporium anthropophilum	NC_061970	Dothideomycetes
Cladosporium zixishanense	MN657180	Dothideomycetes
Cladosporium sphaerospermum	NC_050879	Dothideomycetes
Bipolaris oryzae	NC_057095	Dothideomycetes
Curvularia clavata	NC_062622	Dothideomycetes
Coniothyrium glycines	NC_040008	Dothideomycetes
Shiraia bambusicola	NC_026869	Dothideomycetes
Corynespora cassiicola	NC_056323	Dothideomycetes
Macrophomina phaseolina	NC_060329	Dothideomycetes
Hirsutella vermicola	KY465721	Sordariomycetes
Hirsutella thompsonii	MH367296	Sordariomycetes
Tolypocladium inflatum	KY924883	Sordariomycetes
Fusarium fujikuroi	JX910420	Sordariomycetes
Beauveria bassiana	KT201149	Sordariomycetes
Cordyceps cicadae	MH922223	Sordariomycetes
Sclerotinia borealis	NC_025200	Leotiomycetes
Pseudogymnoascus destructans	NC_033907	Leotiomycetes
Paracoccidioides brasiliensis	NC_007935	Eurotiomycetes
Epidermophyton floccosum	NC_007394	Eurotiomycetes
Morchella importuna	NC_045397	Pezizomycetes
Pyronema omphalodes	NC_029745	Pezizomycetes
Trametes cingulata	NC_013933	Agaricomycetes
Lentinula edodes	NC_018365	Agaricomycetes
